# Supplementary material for: No Remdesivir Resistance Observed in the Phase 3 Severe and Moderate COVID-19 SIMPLE Trials
Source: MDPI journal article supplement (doi:10.3390/v16040546), 2024-03-31
Supplement: s1 [file s1]

**Table S1. Sequence data obtained per study site.**

| <b>Study Site</b>                                                              | <b>Site Number</b>     | <b>No. of Samples<br/>with Attempted<br/>Sequencing</b> | <b>No. of Samples<br/>with Successful<br/>Sequencing</b> |
|--------------------------------------------------------------------------------|------------------------|---------------------------------------------------------|----------------------------------------------------------|
| University Hospital rechts der Isar<br>Technical University of Munich, Germany | 9030                   | 93                                                      | 51                                                       |
| Baylor University Medical Center, USA                                          | 14759, 17914           | 63                                                      | 19                                                       |
| Academische Ziekenhuis Leiden,<br>Netherlands                                  | 17712                  | 41                                                      | 23                                                       |
| Hospital Universitari Vall d'Hebron, Spain                                     | 17860                  | 38                                                      | 34                                                       |
| Klinik für Infektionskrankheiten und<br>Spitalhygiene, Switzerland             | 15128                  | 28                                                      | 18                                                       |
| UH Clinical Research Center/University<br>Hospital Case Western, USA           | 17719                  | 17                                                      | 16                                                       |
| Icahn School of Medicine at Mount Sinai,<br>USA                                | 18408, 18409,<br>18410 | 6                                                       | 6                                                        |
